# Supplementary material for: A dendritic drug–drug conjugate self-assembled hypoxia-responsive supramolecular nanoparticle for combination therapy
Source: Royal Society of Chemistry journal article supplement (doi:10.1039/d4tb02400a), 2025-01-01
Supplement: d4tb02400a1.pdf [file d4tb02400a1.pdf]

# **Dendritic Drug-drug Conjugates Self-Assembled Hypoxia-Responsive Supramolecular Nanoparticle for Combination Therapy**

Tianlong Ling<sup>†a</sup>, Xiaogang Huang<sup>†b</sup>, Yu Xie<sup>c</sup>, Shunliang Zheng<sup>c</sup>, Yue Ding<sup>c,\*</sup>, Chang Du<sup>d,\*</sup>, Jianjun Chen<sup>\*a</sup>

- a. Department of Gastrointestinal Surgery, Renji Hospital, Shanghai Jiao Tong University School of Medicine, Shanghai, 200127, China.
- b. Department of Gastroenterology, Sijing Hospital, Shanghai, China.
- c. School of Chemistry and Chemical Engineering, Nantong University, Nantong 226019, P. R. China.
- d. Clinical Cancer Institute, Center for Translational Medicine, Naval Medical University, Shanghai, 200433, P. R. China.

Submitted to *Journal of Materials Chemistry B*

## **Address correspondence to:**

E-mail address: skyjjchen@sohu.com (Jianjun Chen), yueding@ntu.edu.cn (Yue Ding), duchang19901030@163.com (Chang Du)

## Materials

The Chloroambucil (CB, 98%, J&K), Triethylamine (TEA, 99.5%, Aladdin), (7-Azabenzotriazol-1-yl)-N,N,N',N'-tetramethyluronium hexafluorophosphate (HATU, 99%, TRC), N, N-Diisopropylethylamine (DIPEA, 99%, Adamas) were used as received. 3-(3-dimethylaminopropyl)-1-ethylcarbodiimide hydrochloride (EDC, 97%, Adamas), and 4-dimethylaminopyridine (DMAP, 99%, Adamas) were used as received. Boc-D2, Azo-CB-COOH, and IR806 were synthesized following the procedure described previously.

### Synthesis of Boc-D2-Azo-CB<sub>4</sub>

The Azo-CB-COOH (456.3 mg, 1.25 mmol) and (7-Azabenzotriazol-1-yl)-N,N,N',N'-tetramethyluronium hexafluorophosphate (HATU) (760 mg, 2 mmol) were dissolved in 10 mL of anhydrous DMF and stirred at 0 °C for 5 h. Following this, DIPEA (348 mg, 2.7 mmol) introduced into the mixture, which was then allowed to warm up to room temperature. Solution of Boc-D2 (105.6 mg, 0.125 mmol) in 5 mL dry DMF was added gradually while stirring continued for an additional forty-eight hours. The reaction was terminated by adding water and subsequently extracted with dichloromethane (DCM). The organic phase was dried using sodium sulfate before removing the solvent under reduced pressure. Finally, the crude product underwent purification through column chromatography on silica gel yielding an orange-red solid Boc-D2-Azo-CB<sub>4</sub> (128.3 mg, 46.2% yield).

### Synthesis of IR806-Azo-CB<sub>4</sub>

Initially, trifluoroacetic acid (TFA) (1 mL) was added slowly to solution of Boc-D2-

Azo-CB<sub>4</sub> (130 mg, 0.058 mmol) in 1 mL DCM and stirred for 2 h. The solvent along with any unreacted TFA was then evaporated under reduced pressure, resulting in an orange-red solid of D2-Azo-CB<sub>4</sub> after vacuum drying. Next, IR806 (80 mg, 0.1 mmol) and HATU (58 mg, 0.15 mmol) were dissolved in 5 mL dry DMF and stirred for 3 h at 0 °C. DIPEA (0.5 mL, 0.003 mmol) was introduced into the mixture which was then allowed to warm up to room temperature. A solution of Boc-D2-Azo (217.5 mg, 0.097 mmol) in 2 mL dry DMF was added dropwise into the front solution while stirring continued for another 24 h. The resulting solution was placed into a dialysis tube (MWCO 2000 Da), dialyzed against DMSO for twenty-four hours followed by ultrapure water for an additional twenty-four hours before being freeze-dried to yield IR806-Azo-CB<sub>4</sub> (242.67 mg, 86.3% yield). MALDI-TOF-MS:  $m/z$  2777.1156 (M<sup>+</sup>)

#### **Fabrication of supramolecular nanoparticle SN@IR806-CB**

Generally, IR806-Azo-CB<sub>4</sub> (5 mg) was dissolved in DMF (1 mL), and then aqueous solution (10 mL) of AWBpP6 (1.0 mg/mL) was added into the original solution under vigorous stirring overnight. Then, the mixture solution was transferred into dialysis tube (MWCO 2500 Da) by dialysis against distilled water for 24 h to give the supramolecular nanoparticle SN@IR806-CB.

#### **Detection of <sup>1</sup>O<sub>2</sub> generation.**

The ABDA (0.05 mg/mL) was added into the PBS (20 mL) of SN@IR806-CB with equivalent IR806 concentration of 40 µg/mL at pH 5.0. For the NIR-triggered <sup>1</sup>O<sub>2</sub> release, the above solution was irradiated with NIR irradiation (808 nm, 1.0 W/cm<sup>2</sup>, 5 min). For that ABDA can effectively capture ROS through a rapid reaction with

anthracene moiety, the original UV-Vis absorption of ABDA would gradually reduce in the environment of  $^1\text{O}_2$ .

### ***In vitro* drug release**

The drug release kinetics of SN@IR806-CB was tested at  $37 \pm 0.5$  °C under continuous agitation. The SN@IR806-CB was transferred to the dialysis bag (MWCO 1000 Da), which was immersed in PBS (pH 5.0 or 7.4) with or without of sodium dithionite (2 mM). At specific time intervals, the aliquots (2 mL) were collected and analyzed by UV-Vis spectrophotometer.

### ***In vitro* cytotoxicity**

HCT116 cells suspension in DMEM was placed in a 96-well plate at a density of  $1 \times 10^4$  cells/well (200  $\mu\text{L}$ ) and incubated for 24 h. Subsequently, the medium in each well was replaced with fresh medium containing SN@IR806-CB with different concentrations under hypoxia or normoxia. For irradiation groups, the cells were irradiated with NIR irradiation (808 nm, 1.0 W/cm<sup>2</sup>, 5 min), and further incubated for 18 h. Then, the MTT assays were performed to analyze cytotoxicity.

### ***In vitro* cell internalization and ROS generation**

The HCT116 cells were seeded into a 12-well plate at a density of  $1.0 \times 10^5$  cells/well, and incubated in DMEM for 12 h. Then, the medium was replaced with the fresh DMEM containing SN@IR806-CB with CB concentration of 8  $\mu\text{g/mL}$  for further 4 h incubation under hypoxia or normoxia environment with or without the 808 nm NIR irradiation (1.0 W/cm<sup>2</sup>, 5 min). Then, the cells were stained with lysotracker green probe for 20 min, and imaged by confocal laser scanning microscope (CLSM). After

similar treatment, the cells were stained with 2, 7-dichlorodihydrofluorescein diacetate (DCFH-DA) for 20 min, and observed by CLSM.

### ***In vivo* pharmacokinetics analysis**

The experimental protocol was approved by the Nantong University Institutional Animal Care and Use Committee. The pharmacokinetics analysis was performed using SD rats that were randomly divided into two groups ( $n = 3$ ). The free IR806 and SN@IR806-CB at equivalent IR806 concentrations (5 mg/kg) were injected via the tail vein. The orbital vein blood (0.3 mL) was obtained at a predetermined time, harvested by centrifugation, and frozen at -20 °C. The IR806 level in blood was measured by fluorescence spectroscopy.

### ***In vivo* antitumor activity**

The HCT116 tumor-bearing mice with a tumor volume (80 mm<sup>3</sup>) were spontaneously assigned into five groups ( $n = 3$ ), and then intravenously injected at 0 day and 6 day with PBS, CB, IR806 + NIR, SN@IR806-CB, or SN@IR806-CB + NIR at CB equivalent dose of 2.5 mg/kg and IR806 dose of 2.2 mg/kg. The tumor volume (V) is calculated according to the following equation:  $V = 1/2 \times \text{length} \times \text{width}^2$ . The tumor inhibitory rates (TIR) is calculated by the equation:  $\text{TIR (\%)} = 100 \times (\text{mean tumor volume of the PBS group} - \text{mean tumor volume of others}) / (\text{mean tumor volume of the PBS group})$ . At the end of the treatment, all tumors and major organs (heart, liver, spleens, lung, and kidneys) were dissected for histological examination by H&E staining, TUNEL and PCNA assays.

### **Statistical analysis**

The reaction scheme illustrates the synthesis of IP806-Azo-CB<sub>4</sub>. It begins with the reaction of BOC-D2 (a linear tetrapeptide derivative with a tert-butoxycarbonyl (BOC) protecting group) with 4-((2-chloroethyl)amino)azobenzene-1-carboxylic acid. This reaction, catalyzed by HATU in the presence of DIPEA in DMF for 48 hours, yields the intermediate BOC-D2-Azo-CB<sub>4</sub>, which contains four units of the azobenzene-terminated peptide chain. This intermediate then reacts with 1,1'-bis(4-((2-chloroethyl)amino)phenyl)-4,4'-diphenylsulfone-2,2'-dicarboxylic acid. This second step, also catalyzed by HATU in DMF for 48 hours, involves the removal of the BOC protecting groups and the formation of a macrocyclic structure, resulting in the final product, IP806-Azo-CB<sub>4</sub>, which is a complex macrocycle containing four units of the azobenzene-terminated peptide chain.

[illegible]

**Fig. S2**  $^1\text{H}$  NMR spectra of Boc-D2-Azo-CB<sub>4</sub> (CDCl<sub>3</sub>).

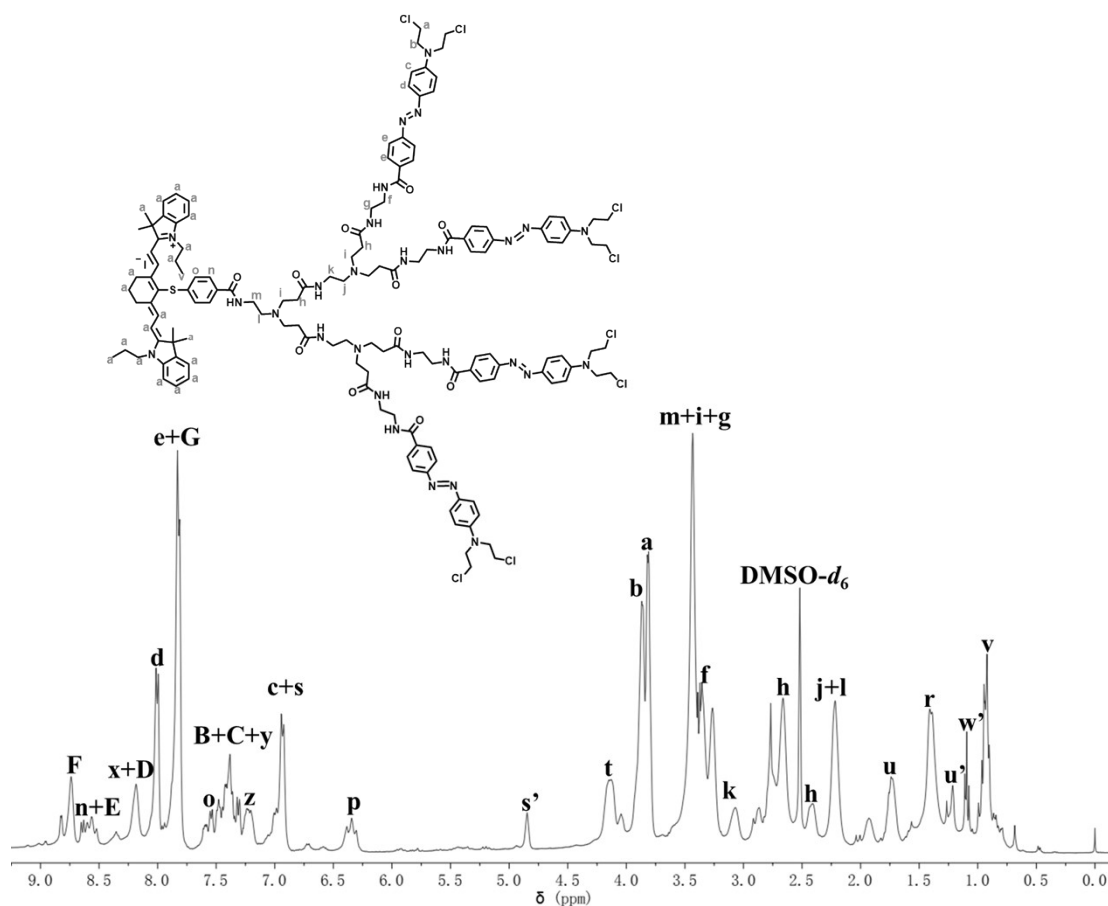

**Fig. S3**  $^1\text{H}$  NMR spectra of IR806-Azo- $\text{CB}_4$  ( $\text{DMSO}-d_6$ ).

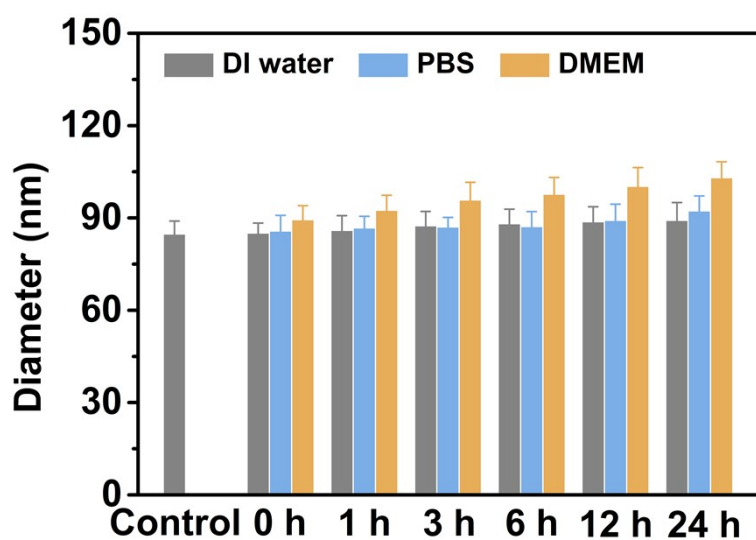

**Fig. S4.** The dependence of  $D_h$  on incubation time in PBS, deionized water (DI water) and dulbecco's modified eagle medium (DMEM) for SN@IR806-CB.

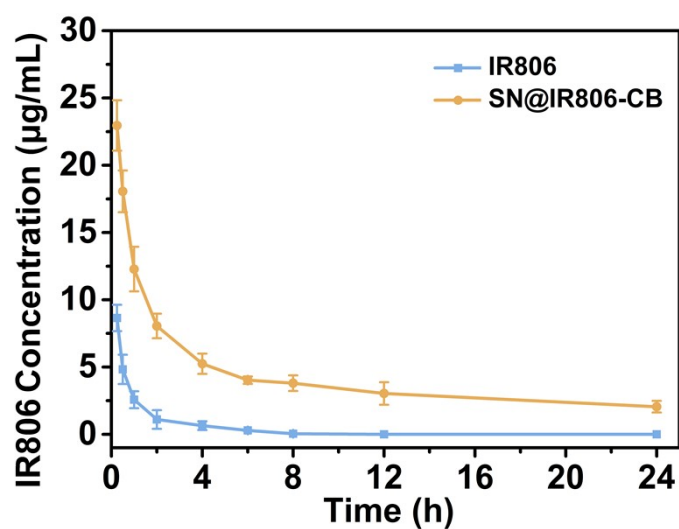

**Fig. S5.** Representative plasma concentration-time profiles of free IR806 and SN@IR806-CB.

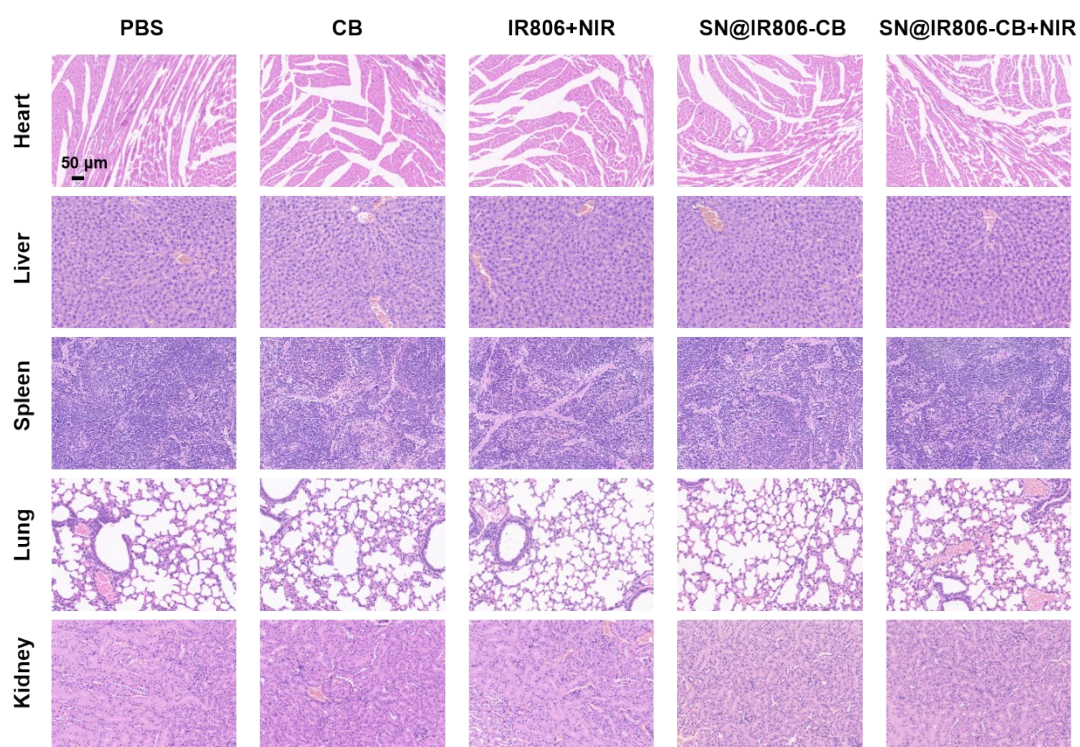

**Fig. S6.** H&E-stained tissue sections from the major organs (heart, liver, spleen, lung, and kidney) dissected after 21 days treatments (magnification  $\times 400$ ).

### Supplementary References

1. Cai Y, Ji C, Zhang S, Su Z, Yin M. Synthesis of water-soluble dye-cored poly(amidoamine) dendrimers for long-term live cell imaging. Science China

Materials. 2018; 61: 1475-1483.

2. Ding Y, Yu W, Shen R, Zheng X, Zheng H, Yao Y, et al. Adv. Healthcare Mater. 2023, 2303308.
3. Ding Y, Yu W, Wang J, Ma Y, Wang C, Wang Y, et al. ACS Macro Lett. 2022; 11: 830–834.
